# Supplementary material for: National physical activity and sedentary behaviour policies in 76 countries: availability, comprehensiveness, implementation, and effectiveness
Source: PubMed Central journal article supplement (PMC7501705; doi:10.1186/s12966-020-01022-6), 2020-09-18
Supplement: 12966_2020_1022_MOESM2_ESM.pdf [file 12966_2020_1022_MOESM2_ESM.pdf]

## Additional file 2 - Percentage of countries with targets for PA and SB, by income level and world regions

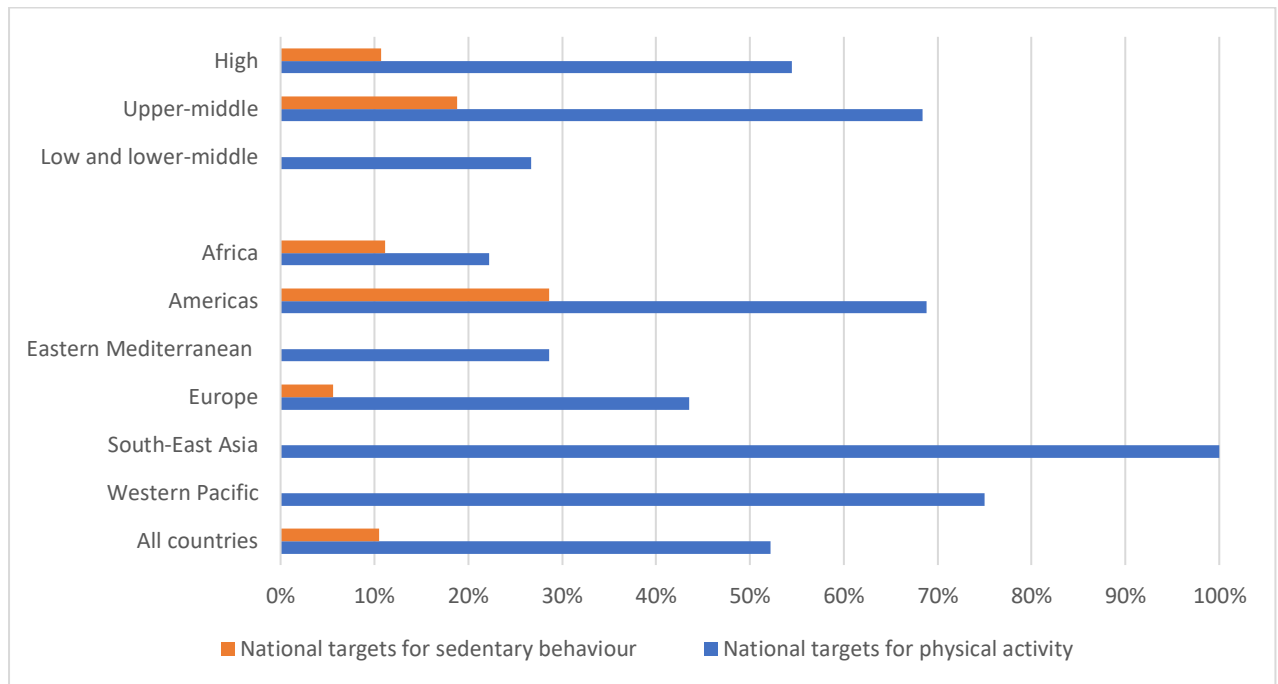

PA: physical activity, SB: sedentary behaviour
